# Supplementary material for: Modulation Effect of Peroxisome Proliferator-Activated Receptor Agonists on Lipid Droplet Proteins in Liver
Source: PubMed Central journal article supplement (PMC4684860; doi:10.1155/2016/8315454), 2015-12-07
Supplement: 8315454.f1.pdf [file 8315454.f1.pdf]

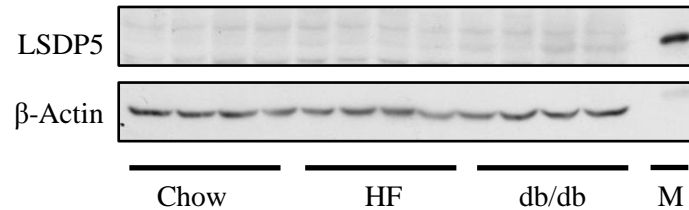

**Supplementary Fig 1.** LSDP5 protein expression in mouse fatty liver. Immunoblot analyses of LSDP5 protein expression in liver from mice fed with chow, high-fat diet (HF) for 20 weeks, and from db/db mice. M: mouse muscle, positive control for LSDP5 expression.

**Supplementary Table 1 Clinical characteristic of subjects**

| Variables                  | Non-FL<br>n = 4 | FL<br>n = 4   |
|----------------------------|-----------------|---------------|
| BMI (kg/m <sup>2</sup> )   | 22.3 ± 0.5      | 26.3 ± 1.6    |
| Age (y)                    | 46 ± 5          | 43 ± 6        |
| Triglyceride (mmol/L)      | 0.4 (0.3-1.0)   | 1.6 (0.9-2.3) |
| Total cholesterol (mmol/L) | 2.0 (1.4-2.5)   | 3.7 (1.7-4.5) |
| Steatosis (%)              | < 5             | 20-30         |

Data represent means ± SE for age and BMI, or median (min-max), or range.
